# Supplementary material for: Autoinhibition of kinesin-1 is essential to the dendrite-specific localization of Golgi outposts
Source: PubMed Central journal article supplement (PMC6028532; doi:10.1083/jcb.201708096), 2018-07-02
Supplement: JCB_201708096_sm.pdf [file JCB_201708096_sm.pdf]

Supplemental material

Kelliher et al., <https://doi.org/10.1083/jcb.201708096>

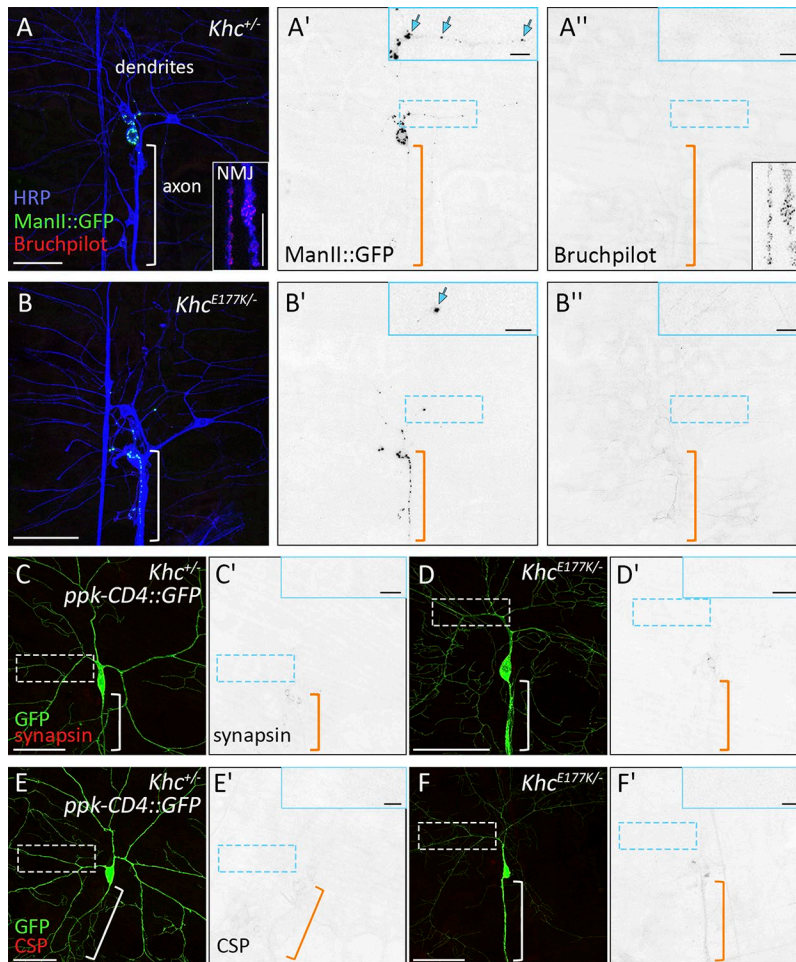

Figure S1. **Localization of Brp, synapsin, and cysteine string protein in *Khc*<sup>+/-</sup> and *Khc*<sup>E177K/-</sup> neurons.** (A–F) Brp, synapsin, and cysteine string protein (CSP) are absent from dendrites of *Khc*<sup>+/-</sup> (A–A'', C, C', E, and E') and *Khc*<sup>E177K/-</sup> neurons (B–B'', D, D', F, and F'). Insets (A', A'', B', B'', C', D', E', and F') show zoomed view of dendrites (boxed areas), which are devoid of synaptic proteins but contain Golgi outposts (A' and B', arrows). *Khc*<sup>E177K/-</sup> axons contain mislocalized ManII::GFP-positive Golgi outposts (B and B'). Inset in A and A'' shows Brp at a neuromuscular junction (NMJ), an internal staining control. Neuronal membranes are labeled by anti-horseradish peroxidase (A–B'') and CD4::GFP (C–F'). Bars: (main images) 50 μm; (insets) 20 μm.

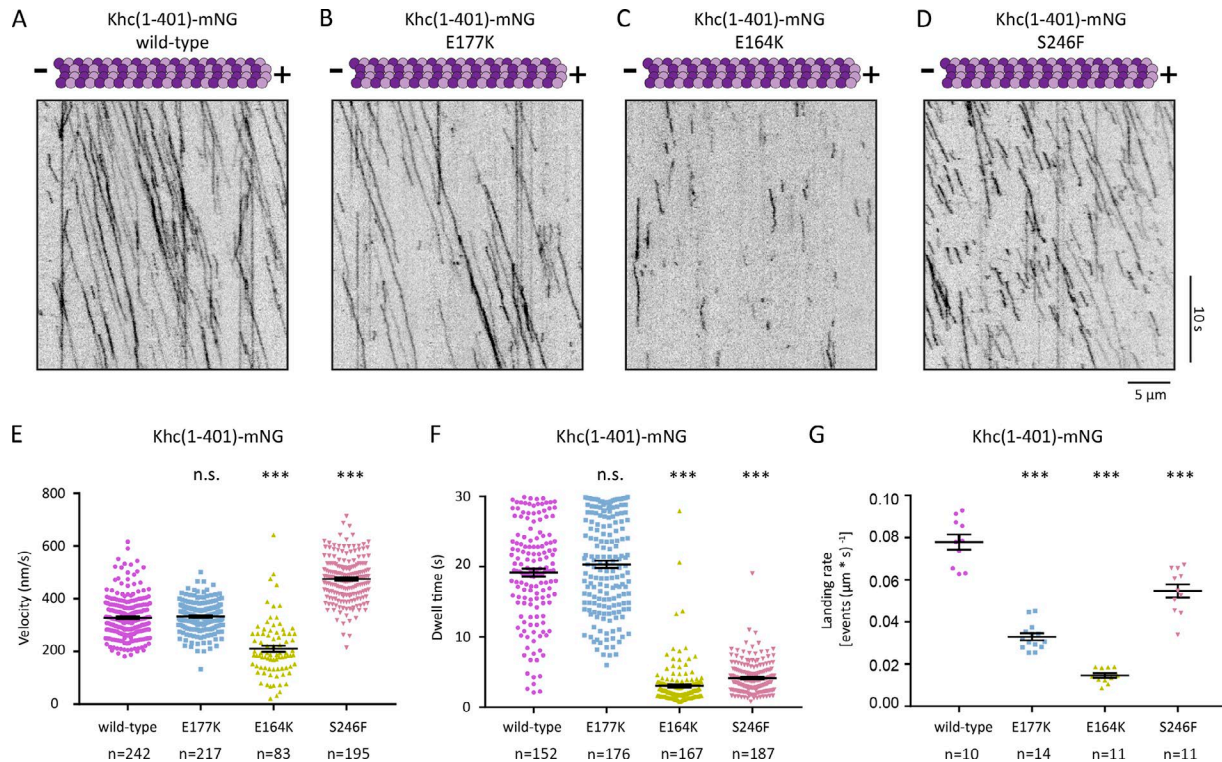

Figure S2. **Effects of mutations on motility of truncated Khc.** (A–D) Representative kymographs showing single-molecule motility of truncated wild-type KHC(1–401) and the indicated mutant versions. All motors were tagged with mNeonGreen at their C termini. Distance is on the x axis, and time is on the y axis. (E–G) Quantification of velocities (E), dwell time (F), and landing rate (G) for each population of motors. Note that the truncated Khc(1–401)-S246F::mNeonGreen moves faster than wild-type, but the full-length S246F mutant motor moves more slowly (Fig. 4). Scatterplots display mean ± SEM from at least two independent experiments. \*\*\*, P < 0.01 compared with the wild-type motor (calculated by two-tailed t test).

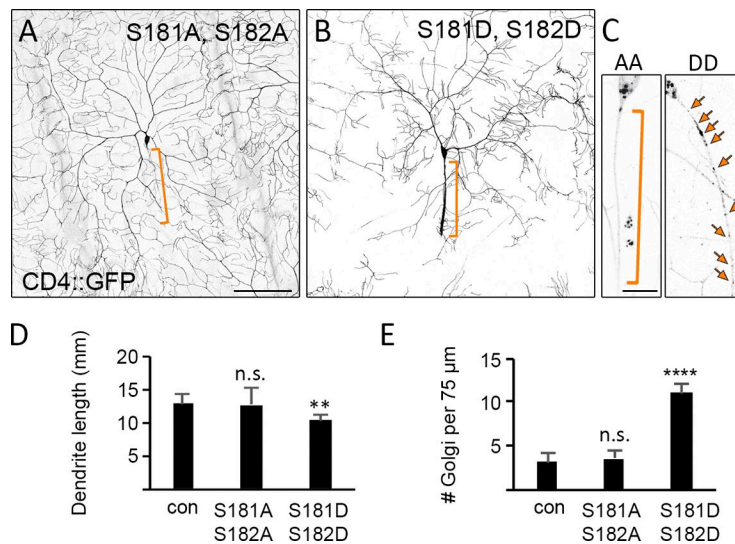

Figure S3. **Effects of Khc phosphomutants on dendrite morphogenesis and Golgi outpost localization.** (A, B, and D) Dendrite arborization is not affected in *Khc<sup>S181A,S182A/-</sup>* neurons but is reduced in the phosphomimetic *Khc<sup>S181D,S182D/-</sup>* mutants. (C and E) Golgi outposts labeled by ManII::GFP (C, arrows) are dendrite-specific in *Khc<sup>S181A,S182A/-</sup>* neurons (left), but localize ectopically to axons in *Khc<sup>S181D,S182D/-</sup>* neurons (right). Quantification of dendrite length (mean ± SD) of 16 (control), 9 (*Khc<sup>S181A,S182A/-</sup>*), and 13 (*Khc<sup>S181D,S182D/-</sup>*) neurons (D) and of Golgi outposts (mean ± SD) in the proximal 75 μm of axons in 9 (control), 8 (*Khc<sup>S181A,S182A/-</sup>*), and 8 (*Khc<sup>S181D,S182D/-</sup>*) neurons (E). Brackets indicate axons. \*\*, P < 0.01; \*\*\*\*, P < 0.0001 in comparison with control and evaluated by one-way ANOVA and Tukey post hoc test. Bars: (A and B) 50 μm; (C) 10 μm.

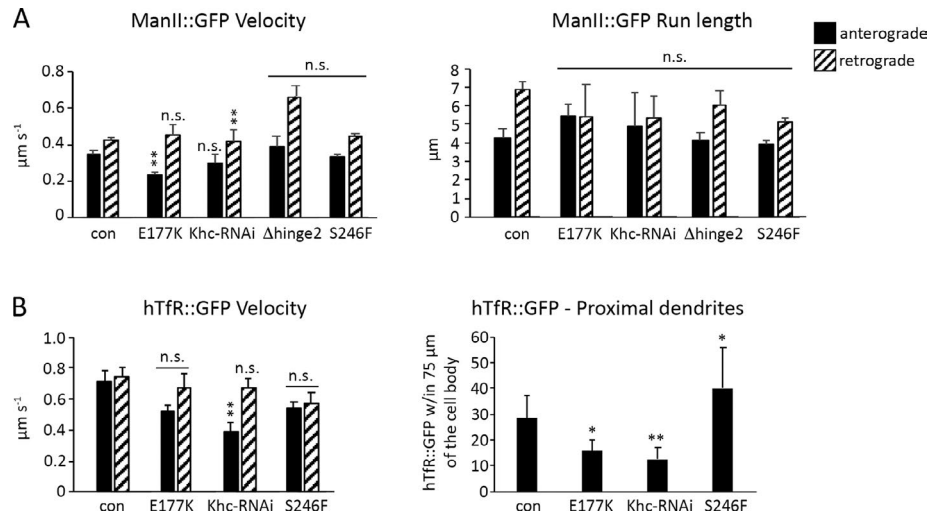

Figure S4. **Golgi outpost and hTfR::GFP motility in control and Khc mutant neurons. (A and B)** Velocity (A and B, mean  $\pm$  SEM) and run length (A, mean  $\pm$  SEM) of ManII::GFP (A) and hTfR::GFP (B) in control and mutant genotypes as indicated. The number of hTfR::GFP puncta is reduced in the proximal dendritic arbor. ManII::GFP: control = 338 events in 9 neurons; E177K = 107 events in 10 neurons; Khc-RNAi = 36 events in 11 neurons; Dhinge2 = 22 events in 9 neurons; and S246F = 519 events in 11 neurons. hTfR::GFP: control = 277 events in 11 neurons; E177K = 65 events in 11 neurons; Khc-RNAi = 88 events in 9 neurons; and S246F = 180 events in 9 neurons. \*,  $P = 0.05-0.01$ ; \*\*,  $P = 0.01-0.001$  in comparison with control and evaluated by one-way ANOVA and Tukey post hoc test.

Table S1. **Oligonucleotides and gene fragments used to synthesize constructs used in this study**

| Oligonucleotide or gene fragment                               | Sequence (5'-3')                                                                                                                                     |
|----------------------------------------------------------------|------------------------------------------------------------------------------------------------------------------------------------------------------|
| Khc73 SQA substitution PCR primer – F                          | TTAGCAGTATGTAGTCCAGATGAAGTTATG                                                                                                                       |
| Khc73 SQA substitution PCR primer – R                          | CTGGCTGCACCCCTTTACATAGGG                                                                                                                             |
| Genomic Khc locus sequencing primer – F                        | TAACCTTTGAGTTCCTCAGTTGG                                                                                                                              |
| Genomic Khc locus sequencing primer – R                        | ATAGGCGTACTTCAAGTTTGGTC                                                                                                                              |
| Genomic Khc locus sequencing primer – F                        | CATAAATACTCGAATATGTTGGACG                                                                                                                            |
| Genomic Khc locus sequencing primer – R                        | TACGGTACCAAGTCTCTTTAGTTTG                                                                                                                            |
| Unc104 loop 12 substitution primer – F                         | CTTTTTCTTGAAGCCACGTCCGCCAGGGCTGAAAT                                                                                                                  |
| Unc104 loop 12 substitution primer – R                         | AACACCAAGAAGGCAGATCACATCCCCTACCGTGATTC                                                                                                               |
| Unc104 loop 11 substitution primer – F                         | CTTGGCACCAGTGAATCCGCTCGCTCGGAACCGCCAAATC                                                                                                             |
| Unc104 loop 11 substitution primer – R                         | GGCACTCGCTTGAAGGAGGGAGCCAACATCAACAAGTCGCTGTC                                                                                                         |
| Primer for plasmid + Khc amplification for Gibson Assembly – F | TTCAACAAATCCCTGACTCGGTCCATGTAGATCTCGTAG                                                                                                              |
| Primer for plasmid + Khc amplification for Gibson Assembly – R | TGTCCAAACTAGCCGTTACCTCGCCGGAGGATGTTTTCCG                                                                                                             |
| unc104 gene fragment amplification for Gibson forward – F      | TCGAAAACATCCTCCGGCAGGTAACGGCTAGTTTGGAC                                                                                                               |
| unc104 gene fragment amplification for Gibson forward – R      | ACTACGAGATCTACATGGACCGAGTCAGGATTTGTTG                                                                                                                |
| Unc104 gene fragment for loop 8                                | TCGAAAACATCCTCCGGGTAACGGCTAGTTTGGACAAATCCTCCACATAGGGACCC<br>AAAAGGGATGCTCCCTCACACGCAGATTGCCCTTGTTTTTCGGATTCAACAAATCC<br>CTGACTCGGTCCATGTAGATCTCGTAGT |
| Khc sequencing primer 1 – F                                    | ACTGTTGCCGAGCACAAATC                                                                                                                                 |
| Khc sequencing primer 2 – F                                    | CTCCAAGAAGGAAATCTTCTGTTTC                                                                                                                            |
| Khc sequencing primer 3 – F                                    | AAATCTTCTCCACCTTGCTG                                                                                                                                 |
| Khc sequencing primer 4 – F                                    | CTCGATCTCCAGCTTCT                                                                                                                                    |
| Khc sequencing primer 5 – F                                    | TCGTAGTAGGAGACCTTGATGTG                                                                                                                              |
| Khc sequencing primer 6 – F                                    | TCCAAAGTTGCTCTTATTGTTTTTC                                                                                                                            |
| Khc sequencing primer 7 – F                                    | ATAGATCTTCTGGCGGAGATTG                                                                                                                               |
| unc104_SKLA substitution PCR primer – F                        | TTTGAAGCGCCCTTGACGTACGG                                                                                                                              |
| unc104_SKLA substitution PCR primer – R                        | CTAGCCGTCCTCGTCGCCGGAGGATG                                                                                                                           |
| K944E mutagenesis PCR primer – F                               | CGATCTGTGCCTGTGGCCACG                                                                                                                                |
| K944E mutagenesis PCR primer – R                               | CCGAGCCGATCCGGTCCGGCCAG                                                                                                                              |
| E177K mutagenesis PCR primer – F                               | TTTCGTAGCCCTTGACGTACGG                                                                                                                               |
| E177K mutagenesis PCR primer – R                               | CGGTTCTGCTCGTCGCCGGAGGATG                                                                                                                            |
| ΔHinge2 deletion PCR primer – F                                | CTGGTCGTAGTTTACAGC                                                                                                                                   |
| ΔHinge2 deletion PCR primer – R                                | TCCAACAAGAAGATCTCC                                                                                                                                   |
| E177A mutagenesis PCR primer – F                               | GGCCGTAGCGCCCTTGACGTACGG                                                                                                                             |
| E177A mutagenesis PCR primer – R                               | CGGTTCTGCTCGTCGCCGGAGGATG                                                                                                                            |
| S246F mutagenesis PCR primer – F                               | AAACCTTCTCGGAACCGGCCAAGTC                                                                                                                            |
| S246F mutagenesis PCR primer – R                               | TCAAGACTGGAGCGGAGGGAACCGTT                                                                                                                           |
| SS181,182AA mutagenesis PCR primer – F                         | GGCGACGAACCGTTCCTGAGCGCC                                                                                                                             |
| SS181,182AA mutagenesis PCR primer – R                         | GCCCCGGAGGATGTTTTCGAGGTGATCG                                                                                                                         |
| SS181,182DD mutagenesis PCR primer – F                         | ATCGACGAACCGTTCCTGAGCGCC                                                                                                                             |
| SS181,182DD mutagenesis PCR primer – R                         | GATCCGGAGGATGTTTTCGAGGTGATCG                                                                                                                         |
| R947E mutagenesis PCR primer – F                               | CTTGGCGATCTGTGCCTGTGGCCACG                                                                                                                           |
| R947E mutagenesis PCR primer – R                               | CCGATCGAGTCCGGCCAGGGTGCAATC                                                                                                                          |
| sfGFP amplification PCR primer for Gibson Assembly – F         | CTCTCCACGGTGTCCTC                                                                                                                                    |
| sfGFP amplification PCR primer for Gibson Assembly – R         | TTCGAAGGCGTCCGATTGCC                                                                                                                                 |
| pHEU amplification PCR primer for Gibson Assembly – F          | ATTAATTAATAAGCCAGTCGGC                                                                                                                               |

Table S1. **Oligonucleotides and gene fragments used to synthesize constructs used in this study (Continued)**

| Oligonucleotide or gene fragment                                                             | Sequence (5'-3')                                                                                                                                                                                                                                                                                                                                                                                                                                                                                                                                                                                                                                                                                                                                                                                                                                                                                                                                                                                                            |
|----------------------------------------------------------------------------------------------|-----------------------------------------------------------------------------------------------------------------------------------------------------------------------------------------------------------------------------------------------------------------------------------------------------------------------------------------------------------------------------------------------------------------------------------------------------------------------------------------------------------------------------------------------------------------------------------------------------------------------------------------------------------------------------------------------------------------------------------------------------------------------------------------------------------------------------------------------------------------------------------------------------------------------------------------------------------------------------------------------------------------------------|
| pIHEU amplification PCR primer for Gibson Assembly – R                                       | TGTAATTGAACTGGGAGTGG                                                                                                                                                                                                                                                                                                                                                                                                                                                                                                                                                                                                                                                                                                                                                                                                                                                                                                                                                                                                        |
| sfGFP sequencing primer – F                                                                  | ATGACGGCACCTACAAGACC                                                                                                                                                                                                                                                                                                                                                                                                                                                                                                                                                                                                                                                                                                                                                                                                                                                                                                                                                                                                        |
| sfGFP sequencing primer – R                                                                  | TGGTGCAGATGAACTTCAGG                                                                                                                                                                                                                                                                                                                                                                                                                                                                                                                                                                                                                                                                                                                                                                                                                                                                                                                                                                                                        |
| E177R mutagenesis PCR primer – F                                                             | GCCGCTAGCGCCCTTGACGTACGG                                                                                                                                                                                                                                                                                                                                                                                                                                                                                                                                                                                                                                                                                                                                                                                                                                                                                                                                                                                                    |
| E177R mutagenesis PCR primer – R                                                             | CGGTTTCGTCTCGTCGCCGGAGGATG                                                                                                                                                                                                                                                                                                                                                                                                                                                                                                                                                                                                                                                                                                                                                                                                                                                                                                                                                                                                  |
| 7×sfGFP11 amplification PCR primer for Gibson Assembly – F                                   | GCGACAGGTGGTGATTGGATCTAGCCGCCGGTGATACC                                                                                                                                                                                                                                                                                                                                                                                                                                                                                                                                                                                                                                                                                                                                                                                                                                                                                                                                                                                      |
| 7×sfGFP11 amplification PCR primer for Gibson Assembly – R                                   | AGGTTAATCCTGTCAACTCGGGTGGCTCTGGAGGTCTGT                                                                                                                                                                                                                                                                                                                                                                                                                                                                                                                                                                                                                                                                                                                                                                                                                                                                                                                                                                                     |
| 7×sfGFP11 amplification PCR primer for Gibson Assembly (introduce short linker sequence) – R | GGTGGCTCTGGAGGTCGTGACCACATGGTCTTCATG                                                                                                                                                                                                                                                                                                                                                                                                                                                                                                                                                                                                                                                                                                                                                                                                                                                                                                                                                                                        |
| Khc backbone amplification PCR primer for Gibson Assembly – F                                | ACGACTCCAGAGCCACCCGAGTTGACAGGATTAACCTGG                                                                                                                                                                                                                                                                                                                                                                                                                                                                                                                                                                                                                                                                                                                                                                                                                                                                                                                                                                                     |
| Khc backbone amplification PCR primer for Gibson Assembly – R                                | TAGATCCAATCACCACTGTCCG                                                                                                                                                                                                                                                                                                                                                                                                                                                                                                                                                                                                                                                                                                                                                                                                                                                                                                                                                                                                      |
| sfGFP gene fragment for Gibson assembly into pIHEU                                           | CTCTCCACAGGTGTCCACTCCCAGTTC AATTACATCTAGA ACTAGTGGATCCCCCGG<br>GCTGCAGGAATTCGATATCAAGCTTATCGATACCGTCGACCTCGAGGGGGGGCCCGG<br>TACCGGTGGATCTGGAGGTTCCGGCGGCTCAGGGGTAGTATGGTGTCCAAGGGCGA<br>GGAGCTGTTACCGGCGTGGTGCCCATCTGGTGGAGCTGGATGGCGACGTGAACGG<br>CCACAAGTTCAGCGTGCCGGCGAGGGCGAGGGCGACGCCACCAACGGCAAGCTGAC<br>CCTGAAGTTCATCTGCACCACCGCAAGCTGCCCGTGCCTGGCCACCTGGTGAC<br>CACCTGACCTACGGCGTGCAGTGCTTCAGCCGCTACCCCGATCACATGAAGCAGCA<br>CGATTTCTCAAGAGGCCATGCCCGAGGGTACGTGCAGGAGCGCACCATCAGCTT<br>CAAGGATGACGGCACCTACAAGACCCGCGCCGAGGTGAAGTTCGAGGGCGATACCCT<br>GGTGAACCCGATCGAGCTGAAGGGCATCGATTTCAAGGAGGATGGCAACATCTGGG<br>CCACAAGCTGGAGTACAATTCAACAGCCACAACGTGTACATCACCGCCGATAAGCA<br>GAAGAACGGCATCAAGGCCAATTCAAGATCCGCCACAATGTGGAGGATGGCTCCGT<br>GCAGCTGGCCGATCACTACCAGCAGAACCCCCATCGGCGACGGCCCACTGCTGCT<br>GCCCGATAACCACTACCTGAGCACCCAGAGCGTCTGTCCAAGGACCCCAACGAGAA<br>GCGCGATCACATGGTGTCTGGAGTTCGTGACCGCGCCGCGCATCACCTGGGCAT<br>GGATGAGCTGTACAAGATTAACCCCTAGAAAGATAATCATATTGTGAATTAATTAAC<br>AAGCCAGTCGGCAATCGGACGCCCTTCGAA |
| sfGFP(1-10) gene fragment for Gibson assembly into pACUH                                     | GGGAATTCGTTAACAGATCTATGTCCAAAGGAGAAGAACTGTTTACCGGTGTTGTGC<br>CAATTTTGGTTGAACTCGATGGTGTGTCAACGGACATAAGTTCTCAGTGAGAGGGC<br>AAGGAGAAGGTGACGCCACCATTGGAAAATTGACTCTTAAATTCATCTGTACTACTG<br>GTAACTTCCTGTACCATGGCCGACTCTCGTAACAACGCTTACGTACGGAGTTCAGT<br>GCTTTTCGAGATAACCCAGACCATATGAAAAGACATGACTTTTTTAAGTCGGCTATGC<br>CTGAAGGTTACGTGCAAGAAAGAACAATTTTCGTTCAAAGATGATGGAAAATATAAAA<br>CTAGAGCAGTTGTTAAATTTGAAGGAGATACTTTGGTTAACCGCATTGAACTGAAAG<br>GAACAGATTTTAAAGAAGATGGTAATATCTTGGACACAAACTCGAATACAATTTTA<br>ATAGTCATAACGTATACATCACTGCTGATAAGCAAAAAGAACGGAATTAAGCGAATT<br>TCACAGTACGCCATAATGTAGAAGATGGCAGTGTCAACTTGCCGACCATTACCAAC<br>AAAAACCCCTATTGGAGACGGTCCGGTACTTCTTCTGATAATCACTACCTCTCAA<br>CACAACAGTCTGAGCAAAGATCCAAATGAAAAAGAACAGGTGGCGCGGGAAGTT<br>AGCTAGAGGATCTTTGTGAAGG                                                                                                                                                                                                                                                 |
| ManII::GFP amplification primer – F                                                          | CACCATGAAGTTAAGTCGCCAG                                                                                                                                                                                                                                                                                                                                                                                                                                                                                                                                                                                                                                                                                                                                                                                                                                                                                                                                                                                                      |
| ManII::GFP amplification primer – R                                                          | TTACTTGTACAGCTCGTCCATGC                                                                                                                                                                                                                                                                                                                                                                                                                                                                                                                                                                                                                                                                                                                                                                                                                                                                                                                                                                                                     |

F, forward; R, reverse.
